# Supplementary material
Source: Springer Nature journal article supplement (https://www.springermedizin.de/resource/supplementary/12968_2009_960_MOESM7_ESM.pdf/9580050)

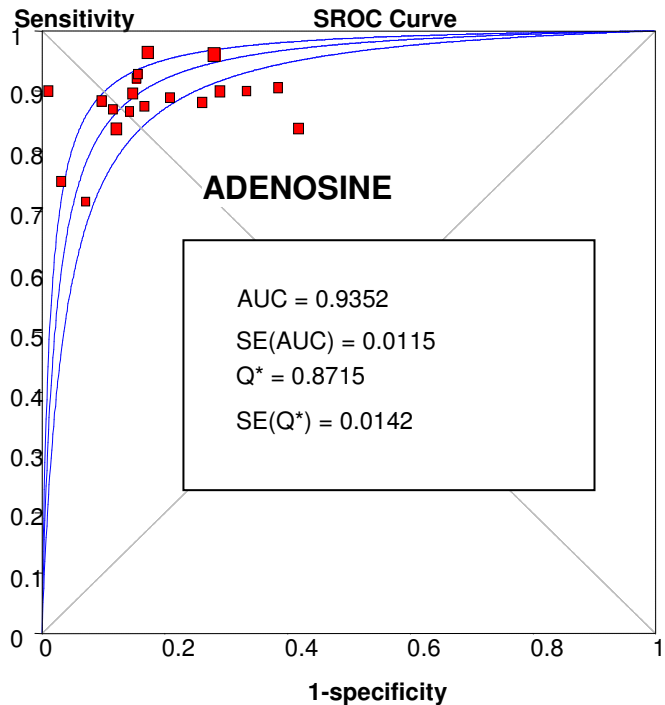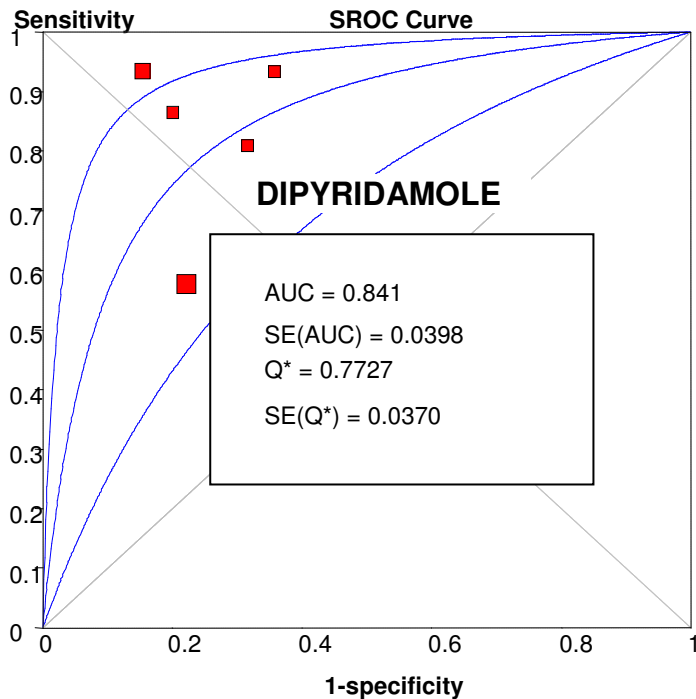

Supplement: MOESM7 [file 9580050]
